# Supplementary material for: Long-term forest-line dynamics in the French Pyrenees: an accelerating upward shift related to forest context, global warming and pastoral abandonment
Source: Copernicus journal article supplement (doi:10.5194/egusphere-2024-4099), 2025-01-15
Supplement: Supplementary file 1 [file egusphere-2024-4099-supplement.pdf]

Table S1

Presentation of the tested and selected values and associated criteria for the band height and forest cover threshold metrics, which are used to estimate forest-line elevation.

| <b>Metric</b>          | <b>Tested values</b> | <b>Selected value</b> | <b>Criteria</b>                                                                           |
|------------------------|----------------------|-----------------------|-------------------------------------------------------------------------------------------|
| Band height            | 25 m; 50 m; 100 m    | 100 m                 | Minimum height for minimum noise level                                                    |
| Forest cover threshold | 0%; 2.5%; 5%         | 5%                    | Minimum threshold to prevent retaining too many small wooded tracts below the forest line |

Table S2

Presentation of the dominant tree species classes used in our study, based on the tree species composition at the forest line and the closed forest line, and their original corresponding categories in the *BD Forêt*® v2 (BDF2), with counts in brackets.

| <b>Dominant tree species class</b> | <b>BDF2 corresponding categories for closed forest</b> | <b>BDF2 corresponding categories for forest</b> |
|------------------------------------|--------------------------------------------------------|-------------------------------------------------|
| Conifers                           | -                                                      | Conifers (15)                                   |
| Mountain pine                      | Mountain pine (50)<br>Conifers (1)*                    | Mountain pine (11)<br>Conifers (38)             |
| Fir                                | Fir (21)                                               | Fir (7)<br>Conifers (10)                        |
| Mixed                              | Mixed (18)                                             | Mixed (7)                                       |
| Deciduous                          | Deciduous (8)                                          | Deciduous (13)                                  |
| Beech                              | Beech (16)                                             | Beech (5)<br>Deciduous (8)                      |

\*The municipality with undifferentiated conifers at the closed forest line was grouped with municipalities where mountain pine formed the closed forest line, as mountain pine also formed closed forest line for the neighbouring municipalities, to avoid classes with small sample size (and subsequent statistical fitting problems).

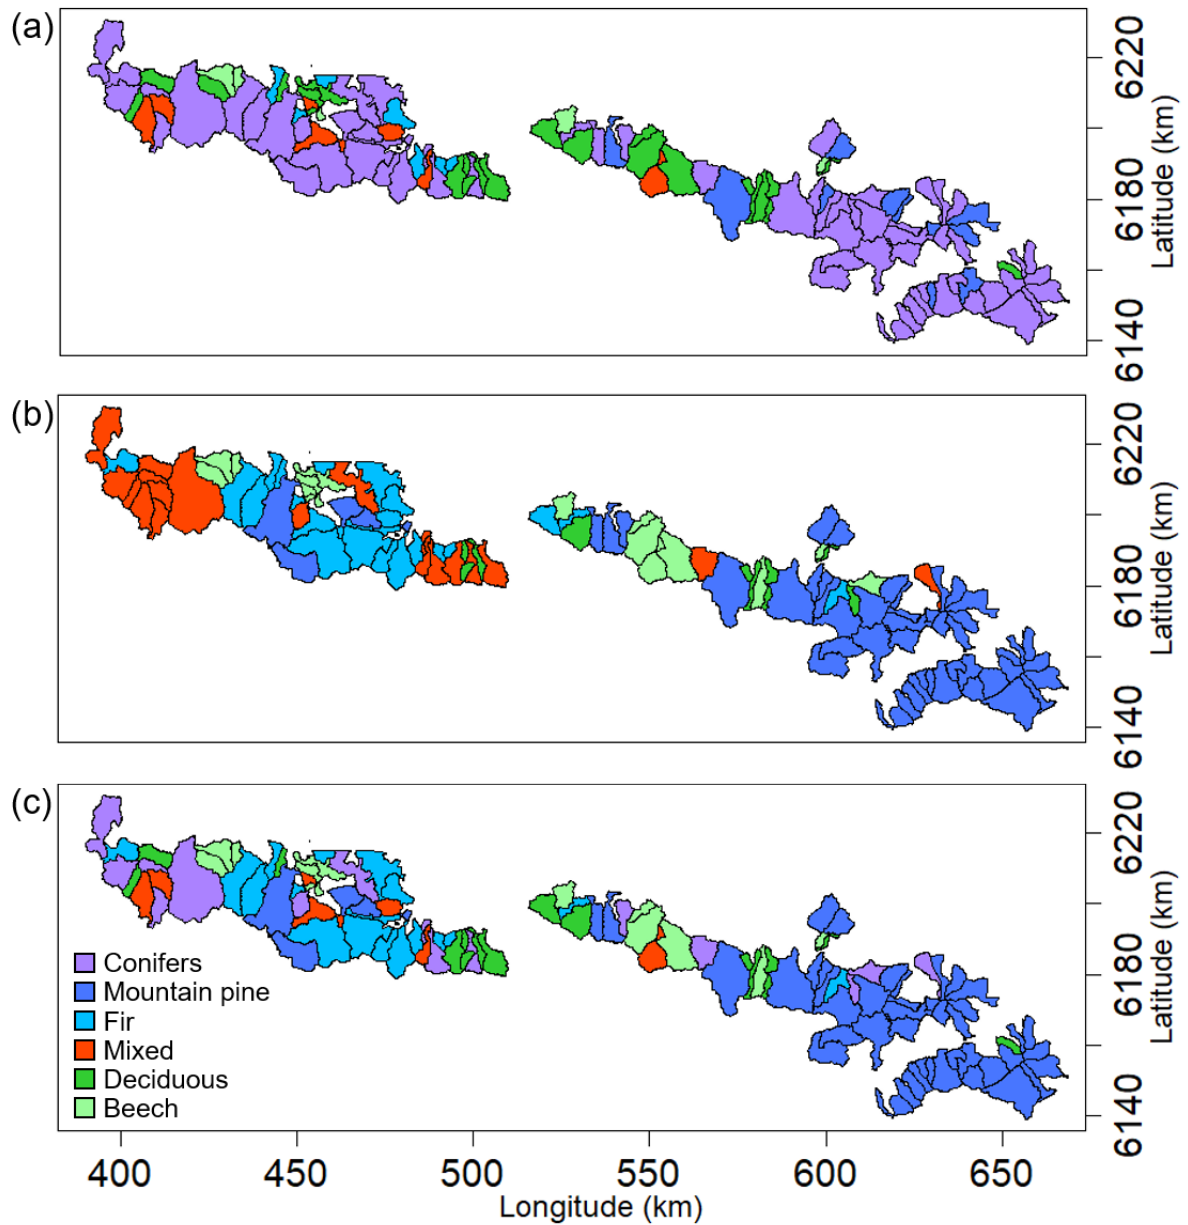

Figure S3

*BD Forêt*® v2 (IGN) dominant tree species category at the forest line (a), dominant tree species class at the closed forest line (b) and deduced dominant tree species class at the forest line (c) for each municipality in the study area. The only municipality where closed forest dominant tree species was “Conifers” was grouped with the category “Mountain pine” (see Table S2). Map (c) was derived from maps (a) and (b). See M&M and Table S2 for details.

(a)

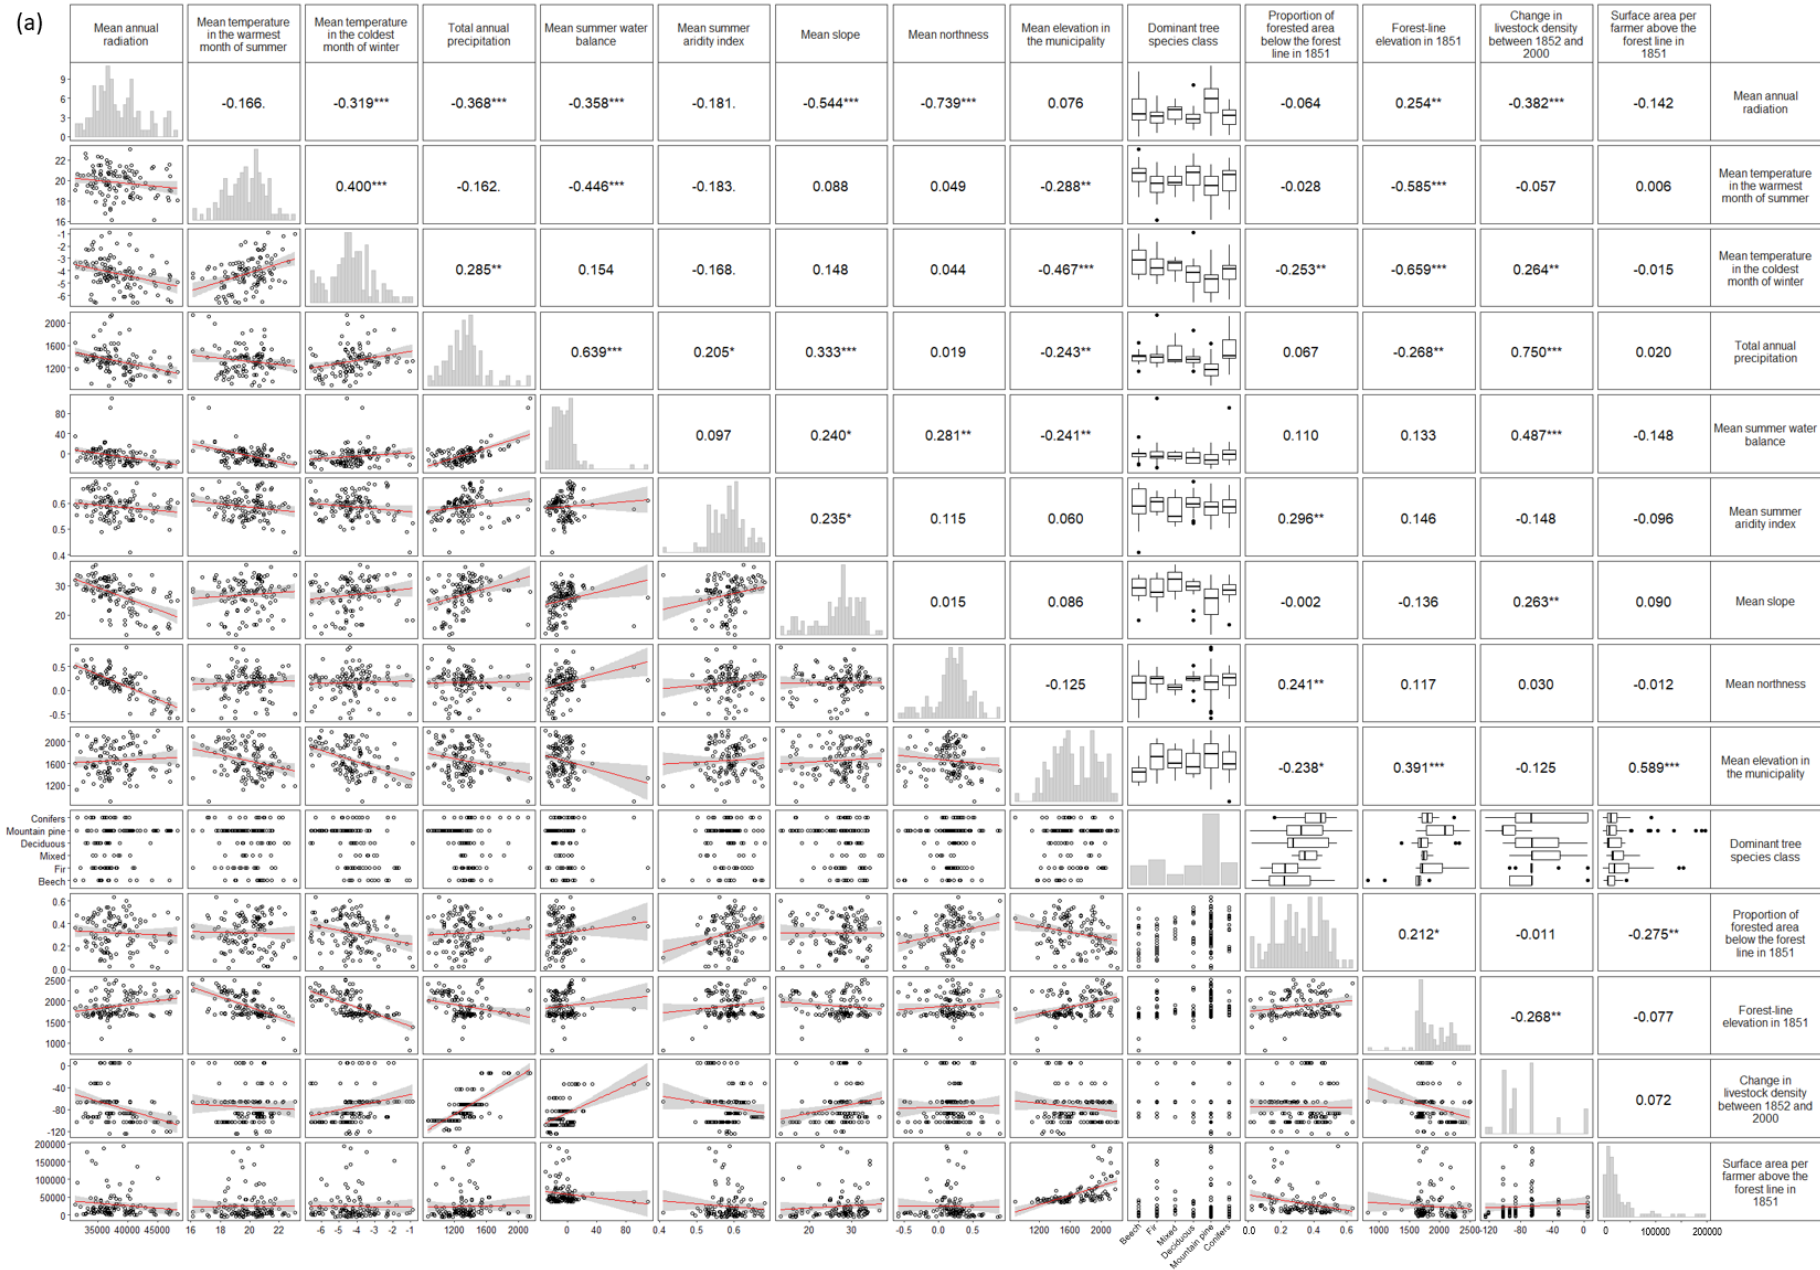

(b)

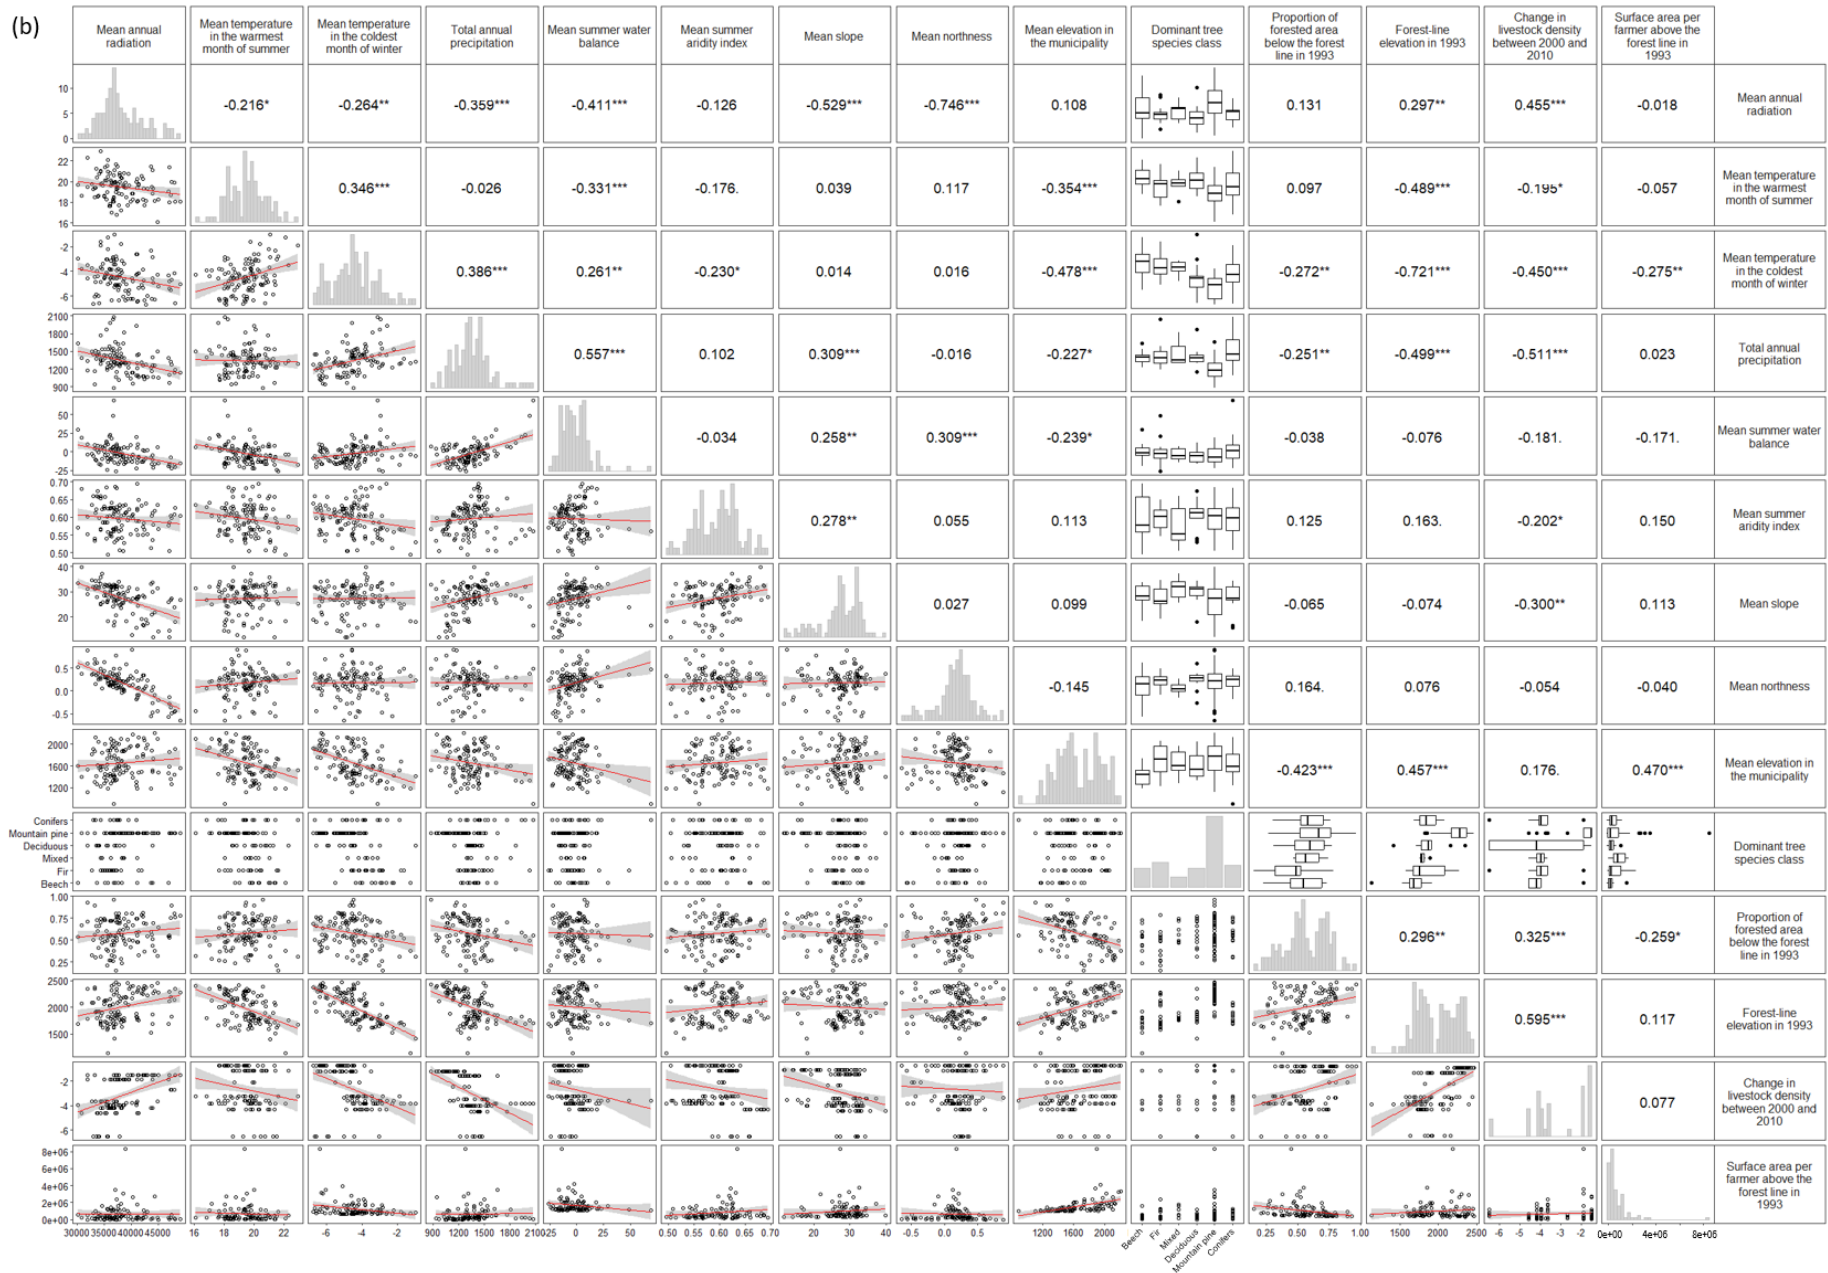

(c)

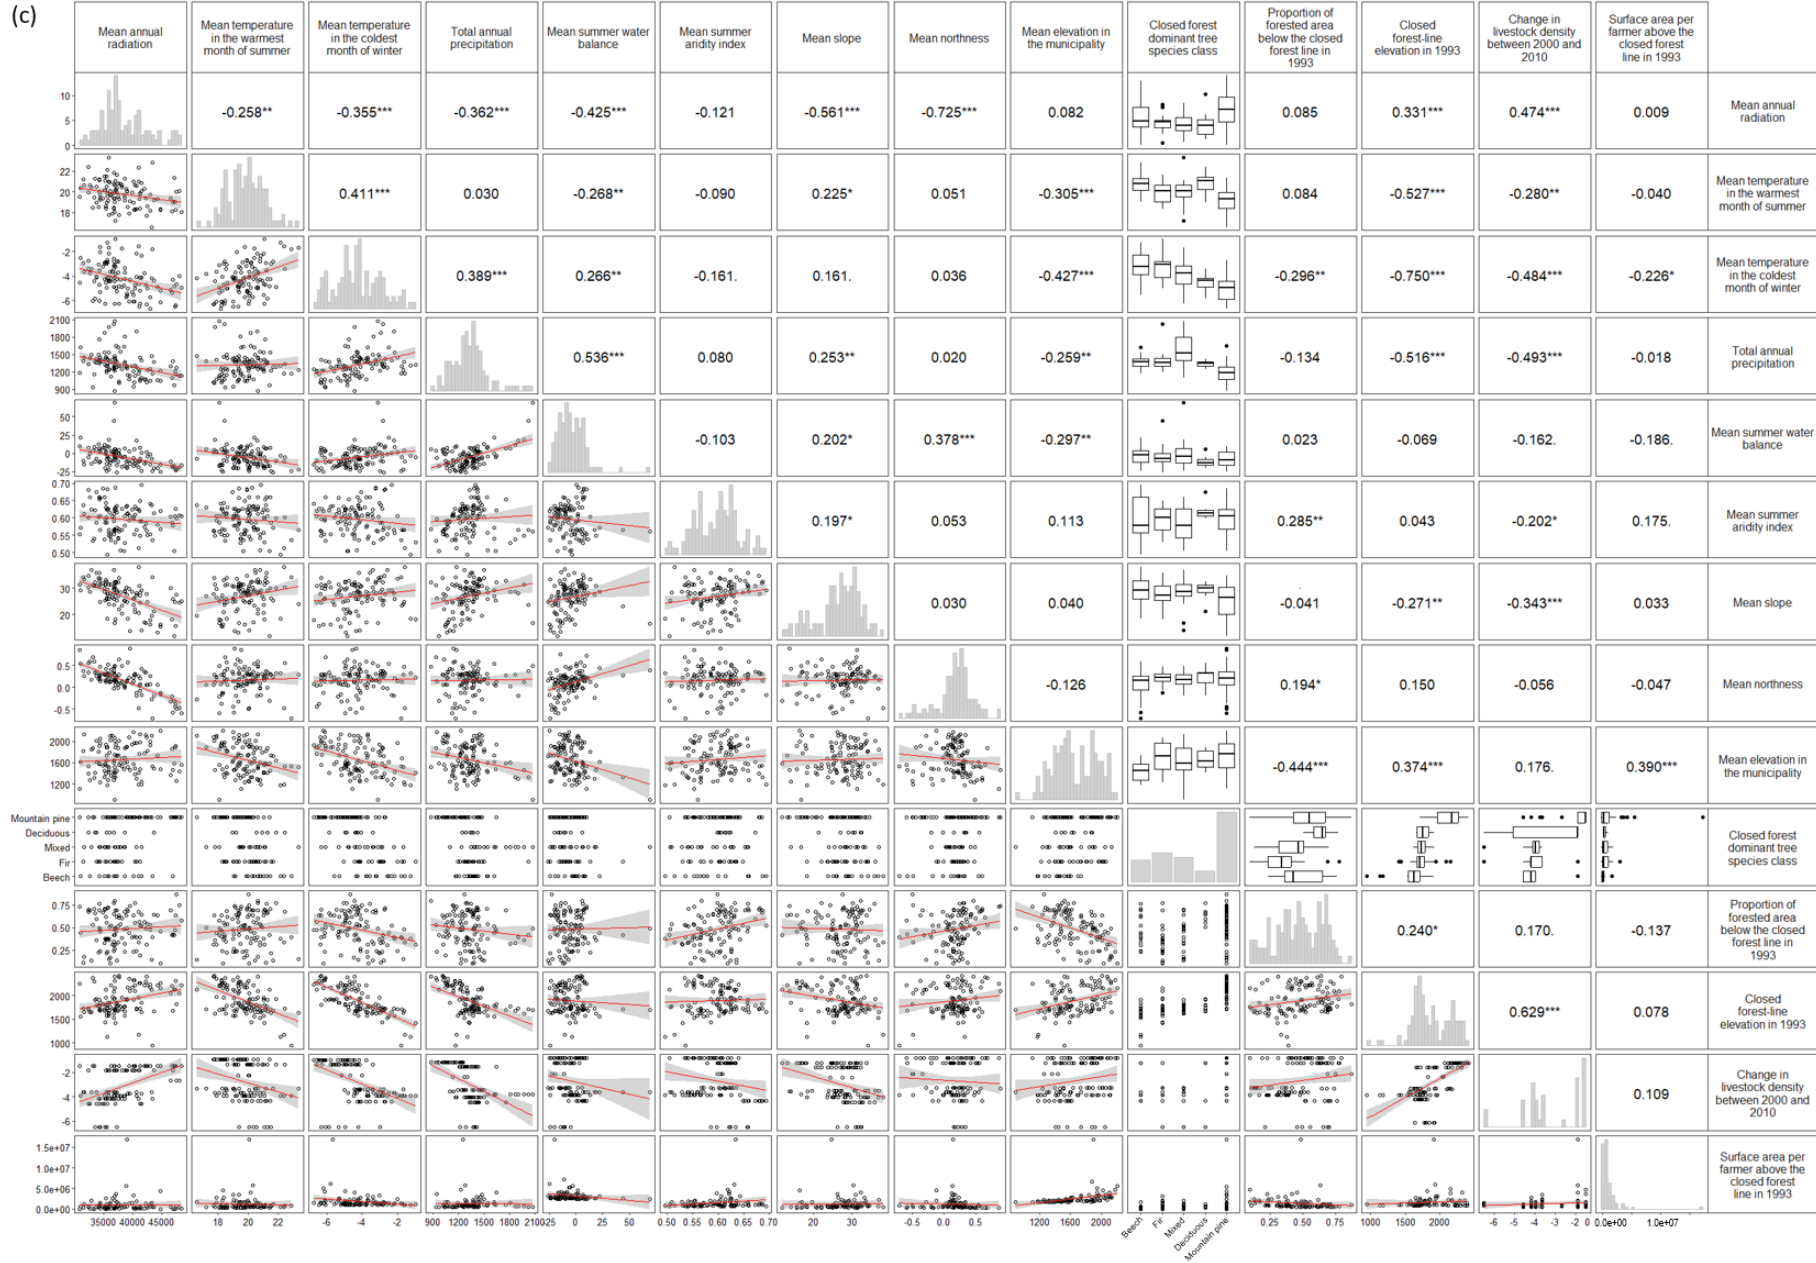



## Figure S4

Correlations between potential drivers for the two time periods: 1851-1993 (a) and 1993-2010 (b) and related to the closed forest line (c). The upper panel shows Pearson's correlation coefficients for continuous *vs.* continuous and boxplots for continuous *vs.* discrete variables. The diagonal indicates the histogram of the distribution of the variable. The lower panel shows points with regression for continuous *vs.* continuous and continuous *vs.* discrete variables. Mean annual radiation, mean temperature in the warmest month of summer, mean temperature in the coldest month of winter, total annual precipitation, mean summer water balance, mean summer aridity index, mean slope and mean northness were calculated in the 300 m above the forest line in 1851 (a), the forest-line in 1993 (b), and the closed forest line in 1993 (c).

The mean annual radiation was negatively correlated with the mean slope in the 300 m above the forest line and the closed forest line, and to a greater extent with the mean northness in the 300 m above the forest line and closed forest line. The mean temperature in the warmest month of summer and the mean temperature in the coldest month of winter in the 300 m above the forest line and the closed forest line were negatively correlated with the forest-line and closed forest-line elevations. Total annual precipitation was positively correlated with mean summer water balance in the 300 m above the forest line and closed forest line. Dominant tree species class varied with forest-line elevation for the two periods: forest-line elevation was maximal for mountain pine, then conifers were second, deciduous stands third, followed by mixed stands and fir, and forest-line elevation was minimal for beech ( $r = 0.53$  and  $r = 0.78$  respectively between 1851 and 1993 and between 1993 and 2010). In addition, dominant tree species class also varied from western to eastern Pyrenees: beech, fir and mixed stands were more frequent in the western part while the mountain pine stands were more frequent in the eastern part of the Pyrenees, deciduous stands were more frequent in the centre, and conifers stands were distributed across the whole range (Figure S3c). Closed forest dominant tree species class followed the same trend: closed forest-line elevation was maximal for mountain pine and minimal for beech, with fir, mixed and deciduous stands in between ( $r = 0.77$ ). In addition, closed forest dominant tree species class also varied from western to eastern Pyrenees: fir and mixed stands were more frequent in the western part while the mountain pine stands were more frequent in the eastern part of the Pyrenees, beech and deciduous stands were more frequent in the centre (Figure S3b). Forest-line and closed forest-line elevations in 1993 were positively correlated with livestock density change between 2000 and 2010. Surface area per farmer above the forest line was positively correlated with the mean elevation in the municipality, and the correlation was higher

in 1851. Forest-line and closed forest-line elevations were negatively correlated with total annual precipitation in the 300 m above the forest line and closed forest line in 1993. Total annual precipitation in the 300 m above the forest line in 1851 was highly and positively correlated with change in livestock density between 1852 and 2010, while total annual precipitation in the 300 m above the forest line and closed forest line in 1993 were negatively correlated with change in livestock density between 2000 and 2010.

Table S5

Forest-line and closed forest-line elevation estimates for each of the 114 municipalities in 1851, 1993 and 2010. The municipalities belonging to the Catalan Pyrenees and used in the calculations of mean forest-line shift velocity for this area are in brown.

| Municipality          | Arrondissement | Department    | Forest-line elevation<br>(m a.s.l.) |      |      | Closed forest-line<br>elevation (m a.s.l.) |      |
|-----------------------|----------------|---------------|-------------------------------------|------|------|--------------------------------------------|------|
|                       |                |               | 1851                                | 1993 | 2010 | 1993                                       | 2010 |
| Artigues              | Foix           | Ariège        | 2101                                | 2294 | 2272 | 2262                                       | 2265 |
| Ascou                 | Foix           | Ariège        | 1804                                | 2043 | 2059 | 1916                                       | 1959 |
| Aston                 | Foix           | Ariège        | 1652                                | 2193 | 2244 | 1908                                       | 2140 |
| Auzat                 | Foix           | Ariège        | 1651                                | 1857 | 1901 | 1814                                       | 1864 |
| Axiat                 | Foix           | Ariège        | 1692                                | 1681 | 1681 | 1680                                       | 1675 |
| Ax-les-Thermes        | Foix           | Ariège        | 2198                                | 2259 | 2270 | 2095                                       | 2251 |
| Gestiès               | Foix           | Ariège        | 1540                                | 1899 | 1937 | 1677                                       | 1865 |
| Goulier               | Foix           | Ariège        | 1645                                | 1778 | 1783 | 1729                                       | 1780 |
| Lercoul               | Foix           | Ariège        | 1648                                | 1743 | 1940 | 1665                                       | 1689 |
| Lordat                | Foix           | Ariège        | 1676                                | 1871 | 1679 | 1665                                       | 1679 |
| Luzenac               | Foix           | Ariège        | 1744                                | 2116 | 2138 | 1951                                       | 2045 |
| Mérens-les-Vals       | Foix           | Ariège        | 2041                                | 2344 | 2372 | 2173                                       | 2333 |
| Mijanès               | Foix           | Ariège        | 2024                                | 2320 | 2326 | 2308                                       | 2307 |
| Montferrier           | Foix           | Ariège        | 1692                                | 2056 | 2049 | 1845                                       | 2005 |
| Montségur             | Foix           | Ariège        | 1683                                | 2118 | 2137 | 2118                                       | 2137 |
| Orgeix                | Foix           | Ariège        | 1875                                | 2083 | 2019 | 1920                                       | 1981 |
| Orlu                  | Foix           | Ariège        | 1896                                | 2179 | 2258 | 1931                                       | 2181 |
| Perles-et-Castelet    | Foix           | Ariège        | 1688                                | 2149 | 2177 | 1949                                       | 2177 |
| Savignac-les-Ormeaux  | Foix           | Ariège        | 1704                                | 2088 | 2286 | 1922                                       | 2100 |
| Siguer                | Foix           | Ariège        | 1673                                | 1926 | 1979 | 1853                                       | 1916 |
| Antras                | Saint-Girons   | Ariège        | 1699                                | 1750 | 1765 | 1730                                       | 1735 |
| Aulus-les-Bains       | Saint-Girons   | Ariège        | 1734                                | 1744 | 1788 | 1692                                       | 1728 |
| Bethmale              | Saint-Girons   | Ariège        | 1652                                | 1853 | 1839 | 1734                                       | 1839 |
| Bonac-Irazein         | Saint-Girons   | Ariège        | 1617                                | 2065 | 1944 | 1716                                       | 1846 |
| Couflens              | Saint-Girons   | Ariège        | 1714                                | 1840 | 1915 | 1779                                       | 1863 |
| Les Bordes-sur-Lez    | Saint-Girons   | Ariège        | 1837                                | 2131 | 2045 | 1814                                       | 1939 |
| Saint-Lary            | Saint-Girons   | Ariège        | 1686                                | 1794 | 1763 | 1642                                       | 1762 |
| Seix                  | Saint-Girons   | Ariège        | 1636                                | 1779 | 1829 | 1719                                       | 1744 |
| Sentein               | Saint-Girons   | Ariège        | 1674                                | 1915 | 1902 | 1790                                       | 1864 |
| Sentenac-d'Oust       | Saint-Girons   | Ariège        | 1650                                | 1807 | 1736 | 1651                                       | 1684 |
| Ustou                 | Saint-Girons   | Ariège        | 1707                                | 1731 | 1767 | 1707                                       | 1733 |
| Couzoouls             | Limoux         | Aude          | 2124                                | 2171 | 2267 | 2100                                       | 2185 |
| Escoubre              | Limoux         | Aude          | 2235                                | 1880 | 2233 | 1844                                       | 1975 |
| Le Bousquet           | Limoux         | Aude          | 1891                                | 2176 | 2231 | 2176                                       | 2180 |
| Bagnères-de-Luchon    | Saint-Gaudens  | Haute-Garonne | 1891                                | 1923 | 2056 | 1799                                       | 1944 |
| Castillon-de-Larboust | Saint-Gaudens  | Haute-Garonne | 2003                                | 2080 | 2066 | 1918                                       | 1981 |
| Cazeaux-de-Larboust   | Saint-Gaudens  | Haute-Garonne | 1805                                | 1827 | 1964 | 1808                                       | 1862 |
| Gouaux-de-Larboust    | Saint-Gaudens  | Haute-Garonne | 1644                                | 1640 | 1640 | 1640                                       | 1640 |



| Municipality           | Arrondissement | Department           | Forest-line elevation (m a.s.l.) |      |      | Closed forest-line elevation (m a.s.l.) |      |
|------------------------|----------------|----------------------|----------------------------------|------|------|-----------------------------------------|------|
|                        |                |                      | 1851                             | 1993 | 2010 | 1993                                    | 2010 |
| Melles                 | Saint-Gaudens  | Haute-Garonne        | 1701                             | 1861 | 1914 | 1776                                    | 1793 |
| Oô                     | Saint-Gaudens  | Haute-Garonne        | 2323                             | 2163 | 2144 | 1854                                    | 2031 |
| Saint-Aventin          | Saint-Gaudens  | Haute-Garonne        | 1731                             | 1916 | 2066 | 1916                                    | 1886 |
| Arbéost                | Argelès        | Hautes-Pyrénées      | 1099                             | 1133 | 1278 | 1131                                    | 1241 |
| Arcizans-Avant         | Argelès        | Hautes-Pyrénées      | 1377                             | 1413 | 1555 | 1413                                    | 1400 |
| Arras-en-Lavedan       | Argelès        | Hautes-Pyrénées      | 1685                             | 1675 | 1682 | 1675                                    | 1682 |
| Arrens-Marsous         | Argelès        | Hautes-Pyrénées      | 2053                             | 2032 | 2136 | 1792                                    | 1841 |
| Barèges                | Argelès        | Hautes-Pyrénées      | 1729                             | 2165 | 2297 | 1970                                    | 2024 |
| Beaucens               | Argelès        | Hautes-Pyrénées      | 1684                             | 1635 | 1716 | 1570                                    | 1651 |
| Cauterets              | Argelès        | Hautes-Pyrénées      | 2503                             | 2395 | 2361 | 1949                                    | 2126 |
| Chèze                  | Argelès        | Hautes-Pyrénées      | 1742                             | 1785 | 1870 | 1533                                    | 1771 |
| Estaing                | Argelès        | Hautes-Pyrénées      | 1670                             | 2062 | 2058 | 1710                                    | 1832 |
| Gavarnie               | Argelès        | Hautes-Pyrénées      | 1778                             | 1900 | 1935 | 1855                                    | 1867 |
| Gazost                 | Argelès        | Hautes-Pyrénées      | 1697                             | 1612 | 1626 | 1439                                    | 1626 |
| Gèdre                  | Argelès        | Hautes-Pyrénées      | 1854                             | 1823 | 1895 | 1754                                    | 1815 |
| Grust                  | Argelès        | Hautes-Pyrénées      | 1711                             | 1712 | 1753 | 1712                                    | 1753 |
| Luz-Saint-Sauveur      | Argelès        | Hautes-Pyrénées      | 1706                             | 1770 | 1852 | 1685                                    | 1823 |
| Saligos                | Argelès        | Hautes-Pyrénées      | 818                              | 1527 | 1501 | 1179                                    | 1461 |
| Sazos                  | Argelès        | Hautes-Pyrénées      | 1884                             | 2029 | 2107 | 1747                                    | 1969 |
| Viey                   | Argelès        | Hautes-Pyrénées      | 1662                             | 1689 | 1700 | 948                                     | 1698 |
| Villelongue            | Argelès        | Hautes-Pyrénées      | 1607                             | 1625 | 1852 | 1623                                    | 1674 |
| Adervielle-Pouchergues | Bagnères       | Hautes-Pyrénées      | 1846                             | 1698 | 1866 | 1636                                    | 1731 |
| Ancizan                | Bagnères       | Hautes-Pyrénées      | 1609                             | 1578 | 1602 | 1578                                    | 1602 |
| Aragouet               | Bagnères       | Hautes-Pyrénées      | 2215                             | 2236 | 2290 | 1946                                    | 2073 |
| Aulon                  | Bagnères       | Hautes-Pyrénées      | 1702                             | 1771 | 1775 | 1718                                    | 1757 |
| Azet                   | Bagnères       | Hautes-Pyrénées      | 1877                             | 2079 | 2068 | 1727                                    | 1980 |
| Bagnères-de-Bigorre    | Bagnères       | Hautes-Pyrénées      | 1739                             | 1817 | 2236 | 1715                                    | 1800 |
| Campan                 | Bagnères       | Hautes-Pyrénées      | 1716                             | 1623 | 1636 | 1615                                    | 1624 |
| Génos                  | Bagnères       | Hautes-Pyrénées      | 1906                             | 1889 | 2091 | 1652                                    | 2025 |
| Germ                   | Bagnères       | Hautes-Pyrénées      | 1650                             | 1684 | 1728 | 1684                                    | 1726 |
| Loudenvielle           | Bagnères       | Hautes-Pyrénées      | 1667                             | 1912 | 2022 | 1656                                    | 1991 |
| Saint-Lary-Soulan      | Bagnères       | Hautes-Pyrénées      | 2494                             | 2276 | 2334 | 2153                                    | 2219 |
| Tramezaignes           | Bagnères       | Hautes-Pyrénées      | 2034                             | 2131 | 2248 | 1922                                    | 2061 |
| Vielle-Aure            | Bagnères       | Hautes-Pyrénées      | 2405                             | 2449 | 2437 | 2125                                    | 2134 |
| Accous                 | Oloron         | Pyrénées-Atlantiques | 1714                             | 1716 | 1753 | 1676                                    | 1717 |
| Arette                 | Oloron         | Pyrénées-Atlantiques | 1808                             | 1696 | 1857 | 1696                                    | 1676 |
| Béost                  | Oloron         | Pyrénées-Atlantiques | 1611                             | 1600 | 1626 | 1577                                    | 1624 |
| Borce                  | Oloron         | Pyrénées-Atlantiques | 1801                             | 1758 | 1783 | 1757                                    | 1782 |
| Cette-Eygun            | Oloron         | Pyrénées-Atlantiques | 1668                             | 1830 | 1870 | 1722                                    | 1754 |
| Eaux-Bonnes            | Oloron         | Pyrénées-Atlantiques | 1833                             | 1685 | 1714 | 1554                                    | 1702 |
| Etsaut                 | Oloron         | Pyrénées-Atlantiques | 1777                             | 1791 | 1802 | 1777                                    | 1798 |
| Laruns                 | Oloron         | Pyrénées-Atlantiques | 1872                             | 1845 | 1906 | 1792                                    | 1825 |

| Municipality                         | Arrondissement | Department           | Forest-line elevation (m a.s.l.) |      |      | Closed forest-line elevation (m a.s.l.) |      |
|--------------------------------------|----------------|----------------------|----------------------------------|------|------|-----------------------------------------|------|
|                                      |                |                      | 1851                             | 1993 | 2010 | 1993                                    | 2010 |
| Lées-Athas                           | Oloron         | Pyrénées-Atlantiques | 2244                             | 1758 | 2025 | 1713                                    | 1715 |
| Lescun                               | Oloron         | Pyrénées-Atlantiques | 1682                             | 1683 | 1708 | 1616                                    | 1696 |
| Urdos                                | Oloron         | Pyrénées-Atlantiques | 1734                             | 1772 | 1821 | 1772                                    | 1787 |
| Corsavy                              | Céret          | Pyrénées-Orientales  | 1635                             | 2200 | 2239 | 2048                                    | 2219 |
| Le Tech                              | Céret          | Pyrénées-Orientales  | 1750                             | 1826 | 1986 | 1826                                    | 1911 |
| Prats-de-Mollo-la-Preste             | Céret          | Pyrénées-Orientales  | 1729                             | 2139 | 2238 | 2044                                    | 2146 |
| Angoustrine-Villeneuve-des-Escalades | Prades         | Pyrénées-Orientales  | 2026                             | 2303 | 2339 | 2150                                    | 2304 |
| Casteil                              | Prades         | Pyrénées-Orientales  | 2341                             | 2348 | 2439 | 2220                                    | 2342 |
| Err                                  | Prades         | Pyrénées-Orientales  | 2204                             | 2312 | 2382 | 2266                                    | 2338 |
| Estoher                              | Prades         | Pyrénées-Orientales  | 2230                             | 2348 | 2342 | 2244                                    | 2285 |
| Eyne                                 | Prades         | Pyrénées-Orientales  | 2205                             | 2397 | 2486 | 2393                                    | 2395 |
| Fontpédrouse                         | Prades         | Pyrénées-Orientales  | 2368                             | 2453 | 2742 | 2361                                    | 2405 |
| Fontrabiouse                         | Prades         | Pyrénées-Orientales  | 2115                             | 2395 | 2362 | 2117                                    | 2146 |
| Formiguères                          | Prades         | Pyrénées-Orientales  | 2030                             | 2375 | 2373 | 2234                                    | 2349 |
| Les Angles                           | Prades         | Pyrénées-Orientales  | 2244                             | 2340 | 2347 | 2305                                    | 2307 |
| Llo                                  | Prades         | Pyrénées-Orientales  | 2257                             | 2390 | 2403 | 2328                                    | 2379 |
| Mantet                               | Prades         | Pyrénées-Orientales  | 2176                             | 2337 | 2339 | 2293                                    | 2314 |
| Mosset                               | Prades         | Pyrénées-Orientales  | 2158                             | 2261 | 2272 | 2213                                    | 2269 |
| Nohèdes                              | Prades         | Pyrénées-Orientales  | 2220                             | 2270 | 2242 | 2220                                    | 2241 |
| Nyer                                 | Prades         | Pyrénées-Orientales  | 2204                             | 2462 | 2453 | 2392                                    | 2450 |
| Olette                               | Prades         | Pyrénées-Orientales  | 2256                             | 2279 | 2287 | 2262                                    | 2268 |
| Palau-de-Cerdagne                    | Prades         | Pyrénées-Orientales  | 2038                             | 2118 | 2123 | 2120                                    | 2117 |
| Planès                               | Prades         | Pyrénées-Orientales  | 2425                             | 2427 | 2423 | 2414                                    | 2420 |
| Porta                                | Prades         | Pyrénées-Orientales  | 1999                             | 2397 | 2401 | 2317                                    | 2368 |
| Porté-Puymorens                      | Prades         | Pyrénées-Orientales  | 1844                             | 2369 | 2409 | 2256                                    | 2381 |
| Py                                   | Prades         | Pyrénées-Orientales  | 2232                             | 2248 | 2267 | 2212                                    | 2244 |
| Réal                                 | Prades         | Pyrénées-Orientales  | 2120                             | 2259 | 2249 | 2223                                    | 2249 |
| Saint-Pierre-dels-Forcats            | Prades         | Pyrénées-Orientales  | 2251                             | 2367 | 2505 | 2367                                    | 2412 |
| Sansa                                | Prades         | Pyrénées-Orientales  | 2232                             | 2289 | 2347 | 2202                                    | 2311 |
| Taurinya                             | Prades         | Pyrénées-Orientales  | 2136                             | 2350 | 2356 | 2301                                    | 2344 |
| Thuès-Entre-Valls                    | Prades         | Pyrénées-Orientales  | 2412                             | 2427 | 2565 | 2395                                    | 2409 |
| Valcebollère                         | Prades         | Pyrénées-Orientales  | 2179                             | 2223 | 2278 | 2178                                    | 2229 |
| Valmanya                             | Prades         | Pyrénées-Orientales  | 2031                             | 2205 | 2224 | 2074                                    | 2201 |
| Vernet-les-Bains                     | Prades         | Pyrénées-Orientales  | 2266                             | 2349 | 2437 | 2218                                    | 2212 |

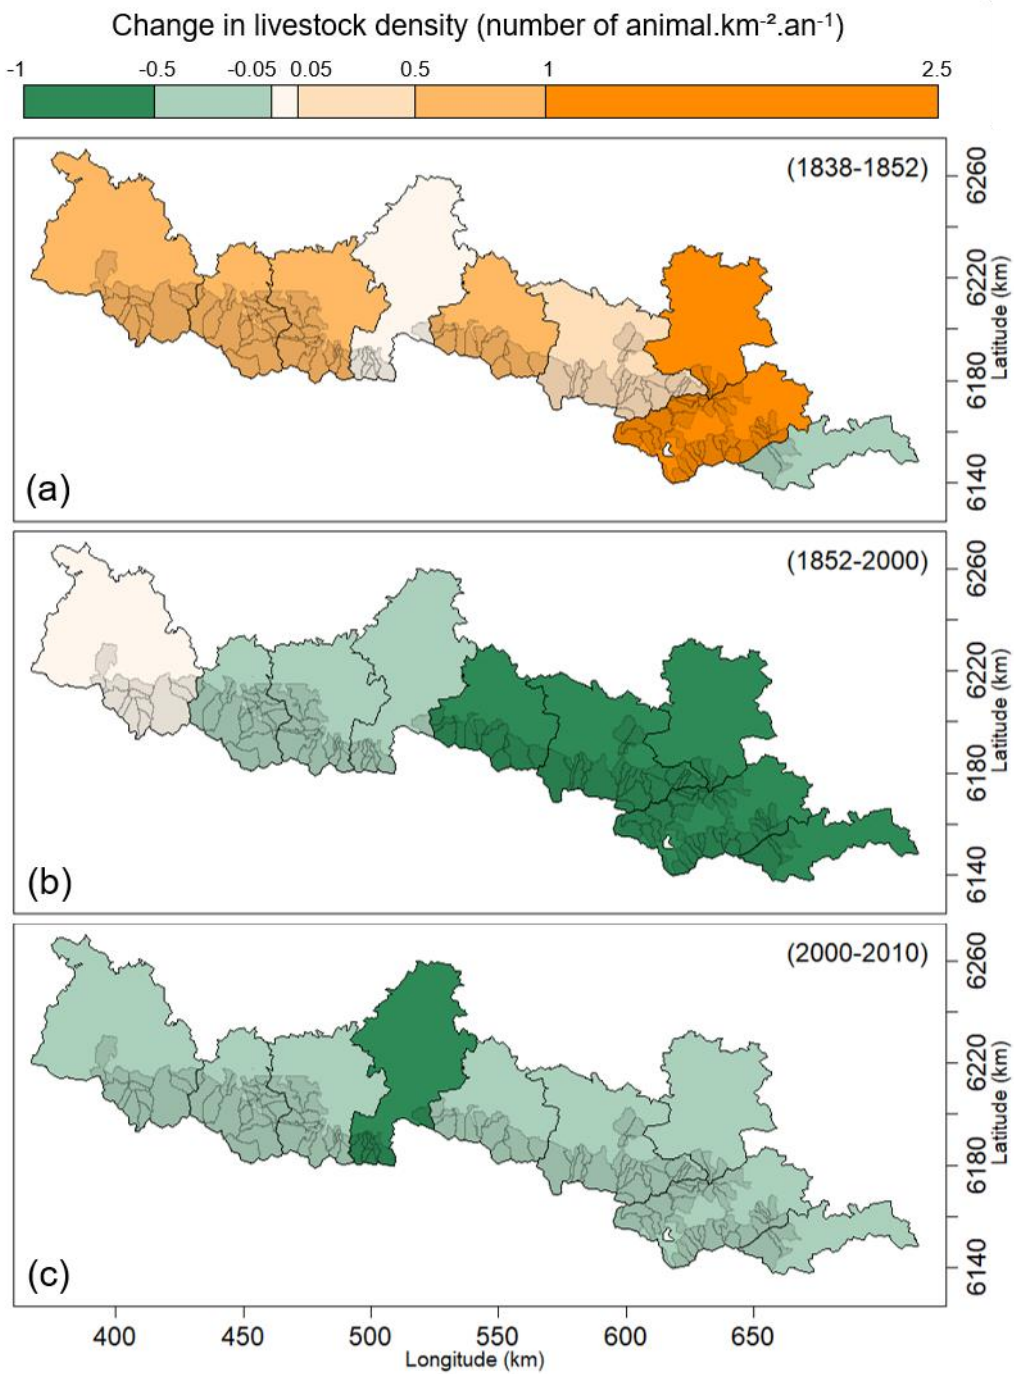

Figure S6

Change in livestock density (number of animals.km<sup>-2</sup>.an<sup>-1</sup>) in the 9 arrondissements of the study area for three periods: 1838-1852 (a), 1852-2000 (b) and 2000-2010 (c). The 114 municipalities that belong to these 9 arrondissements are also shown in transparency.

Table S7

Mean forest-line and closed forest-line shift velocities for the total of municipalities, the western municipalities (division at 520 km of longitude), the eastern municipalities and the municipalities belonging to the Catalan Pyrenees (see Table S5). The corresponding calculation is presented in the last column.

| Shift period                   | Total | West  | East | Catalan Pyrenees | Calculation                                                                                                                                                             |
|--------------------------------|-------|-------|------|------------------|-------------------------------------------------------------------------------------------------------------------------------------------------------------------------|
| <b>Forest 1851-1993</b>        | 0.87  | 0.22  | 1.33 | 1.45             | Mean forest-line shift velocity between 1851 and 1993                                                                                                                   |
| <b>Forest 1993-2010</b>        | 3.55  | 5.56  | 2.09 | 2.82             | Mean forest-line shift velocity between 1993 and 2010                                                                                                                   |
| <b>Forest 1901-2018</b>        | 1.44  | 1.36  | 1.49 | 1.74             | (mean forest-line shift velocity between 1851 and 1993 * (1993-1901) + mean forest-line shift velocity between 1993 and 2010 * (2018-1993)) / (2018-1901)               |
| <b>Forest 1953-2015</b>        | 1.82  | 2.12  | 1.60 | 1.94             | (mean forest-line shift velocity between 1851 and 1993 * (1993-1953) + mean forest-line shift velocity between 1993 and 2010 * (2015-1993)) / (2015-1953)               |
| <b>Forest 1956-2006</b>        | 1.56  | 1.61  | 1.53 | 1.81             | (mean forest-line shift velocity between 1851 and 1993 * (1993-1956) + mean forest-line shift velocity between 1993 and 2010 * (2006-1993)) / (2006-1956)               |
| <b>Closed forest 1851-1993</b> | 0.07  | -0.71 | 0.63 | 0.77             | Mean closed forest-line shift velocity between 1851 and 1993                                                                                                            |
| <b>Closed forest 1993-2010</b> | 5.58  | 8.28  | 3.62 | 4.18             | Mean closed forest-line shift velocity between 1993 and 2010                                                                                                            |
| <b>Closed forest 1953-2015</b> | 2.03  | 2.48  | 1.69 | 1.98             | (mean closed forest-line shift velocity between 1851 and 1993 * (1993-1953) + mean closed forest-line shift velocity between 1993 and 2010 * (2015-1993)) / (2015-1953) |
